# Supplementary material for: Rats Lacking Dopamine Transporter Display Increased Vulnerability and Aberrant Autonomic Response to Acute Stress
Source: Biomolecules. 2020 May 31;10(6):842. doi: 10.3390/biom10060842 (PMC7356162; doi:10.3390/biom10060842)

Supplementary Figure 1

A

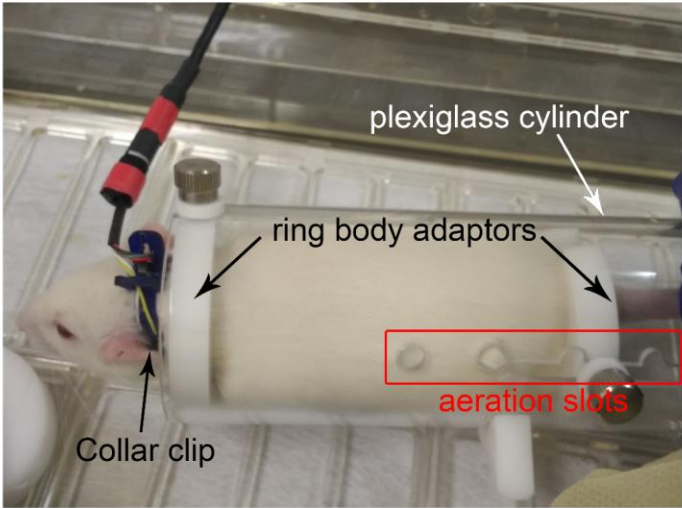

B

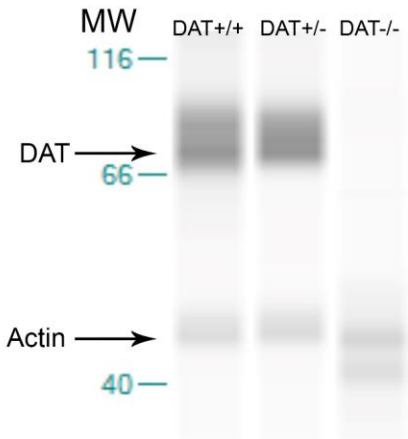

C

|                           | DAT+/+    | DAT+/-    | DAT-/- |
|---------------------------|-----------|-----------|--------|
| DAT                       | 240771    | 153250    | 0      |
| $\beta$ -Actin            | 230956    | 225523    | 255066 |
| Ratio DAT/ $\beta$ -Actin | 1.0424973 | 0.6795316 | 0      |

D

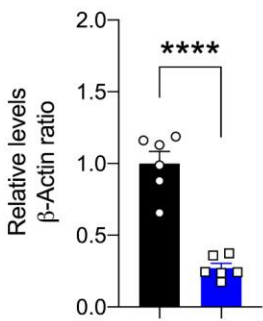

E

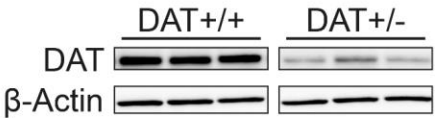

Supplementary Figure 2

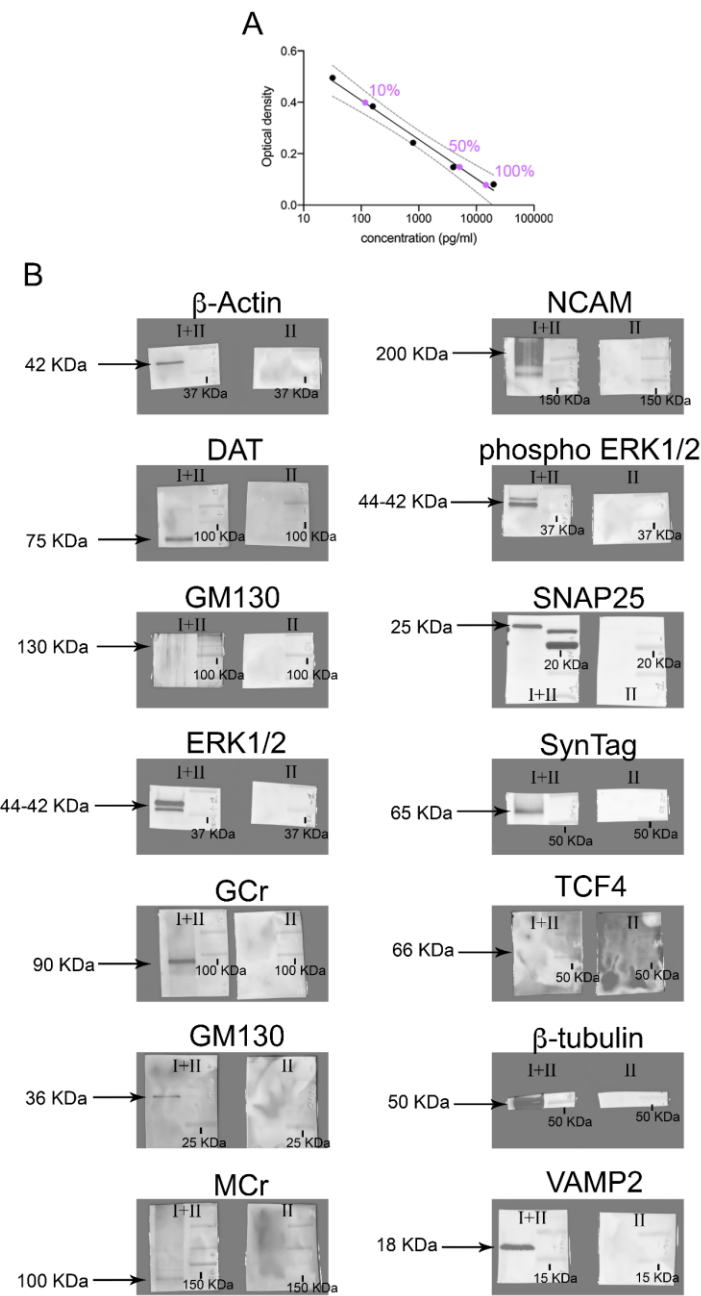

Supplementary Figure 3

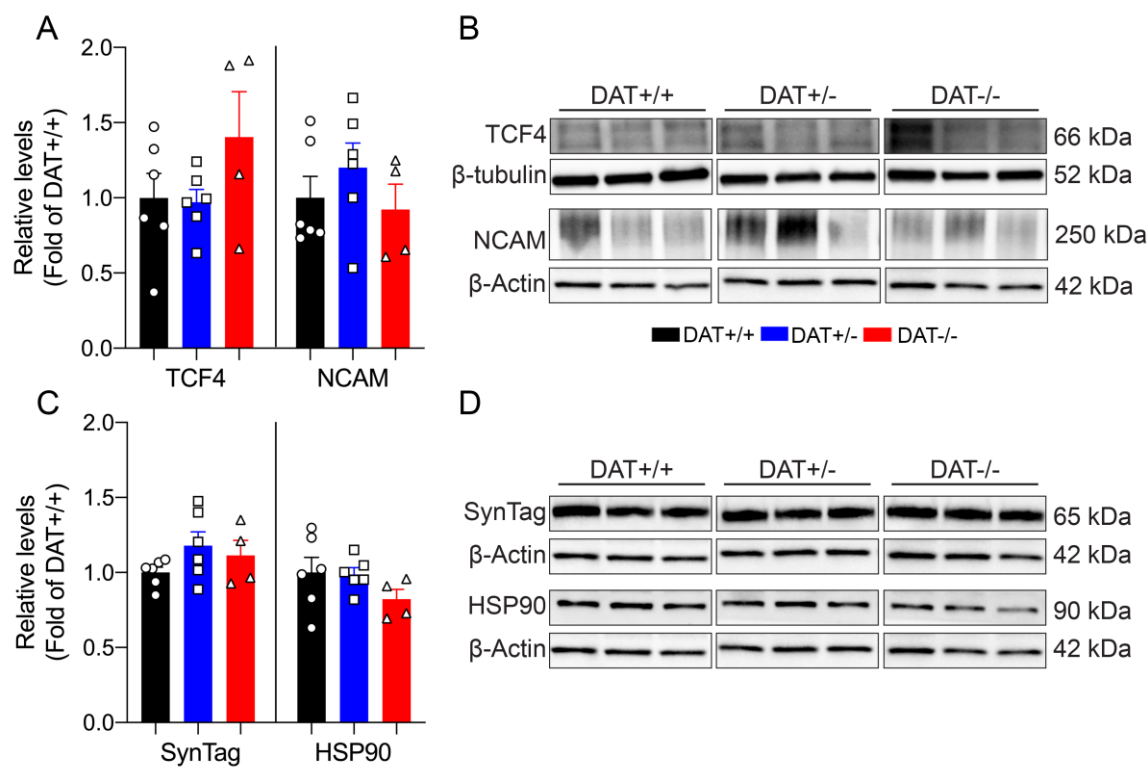

Supplement: Supplementary file 1 [file biomolecules-10-00842-s001.pdf]
